# Supplementary material for: Differential Metabolites and Metabolic Pathways Involved in Aerobic Exercise Improvement of Chronic Fatigue Symptoms in Adolescents Based on Gas Chromatography–Mass Spectrometry
Source: Int J Environ Res Public Health. 2022 Feb 18;19(4):2377. doi: 10.3390/ijerph19042377 (PMC8872503; doi:10.3390/ijerph19042377)
Supplement: Supplementary file 1 [file ijerph-19-02377-s001.zip › ijerph-1549121-supplementary.pdf]

| Sample  | Area    | Sample | Area    |
|---------|---------|--------|---------|
| QC 1    | 2976853 | QC 6   | 3327254 |
| QC 2    | 3580924 | QC 7   | 3588170 |
| QC 3    | 3791119 | QC 8   | 4399838 |
| QC 4    | 3422938 | QC 9   | 4053487 |
| QC 5    | 3545681 | QC 10  | 4469056 |
| Average | 3715532 | RSD    | 12.69%  |

Figure S1: Ion flow diagram of all samples.

It can be seen from the table that the relative standard deviation (RSD) of peak area of internal standard in QC sample is  $\leq 30\%$ , and the RSD is 12.69%, indicating that the instrument data collection is stable.

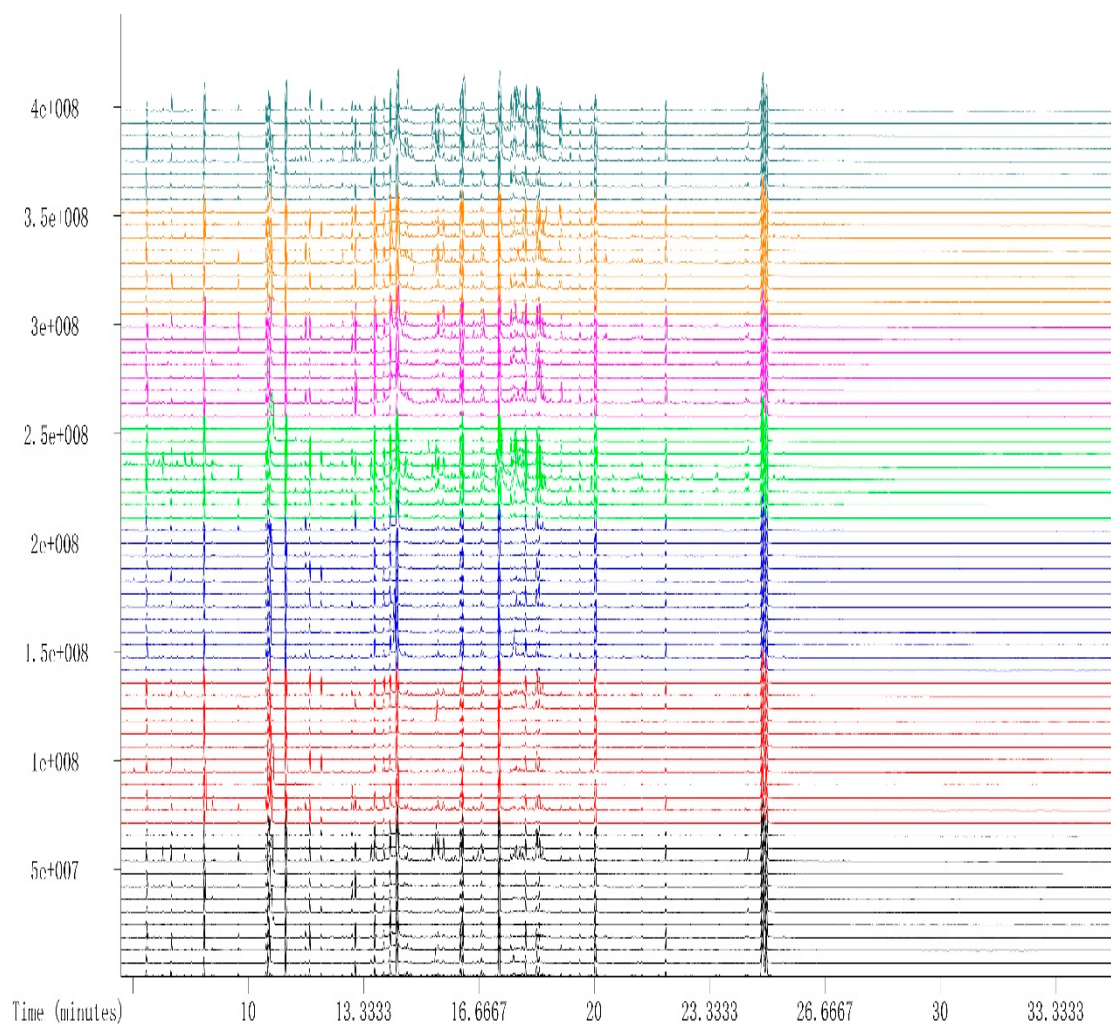

Figure S1 Ion flow diagram of all samples

Each line represents a sample
